# Supplementary material
Source: publisher figshare collection journal article supplement (https://gsajournals.figshare.com/articles/dataset/_/7405892)
Supplement: Supplementary file 2 [file 1]

## File S2

### Validation of four-way cross formulas for DH- $k$ and RIL- $k$ and evolution of RIL variance depending on selfing generations

In File S1, we considered DH lines generated from F1' (DH-1), i.e., only two meioses took place. Progeny variance for DH-1 is expressed in terms of parental expected recombination frequency  $c^{(1)}$  (Table 2 S1). For recombinant inbred lines (RILs) or when DH lines are generated from higher selfing generations, the expected frequency of recombinants increases depending on the number of selfing generations. In the following  $k$  denotes the generation from which progeny are derived (Figure 1). The expected frequency of recombinants in generation  $k$  can be derived from the genotype probabilities given in Broman (2012) as done in File S1 of Lehermeier et al. (2017). Hence, for DH lines after  $k$  generations,  $c^{(1)}$  in Table 2 S1 should then be replaced by  $c^{(k)}$ , leading to the general four-way DH- $k$  formula as shown in Table 1:

$$c^{(k)} = \frac{2c^{(1)}}{1 + 2c^{(1)}} \left( 1 - 0.5^k (1 - 2c^{(1)})^k \right), \forall k \in \mathbb{N}^*$$

In case of RILs, no doubling of gametes takes place and the covariance for RILs after generation  $k$  is obtained by updating  $c^{(k)}$  by  $c^{(k)} + 0.5 [0.5(1 - 2c^{(1)})]^k, \forall k \in \mathbb{N}^*$  (Table 1). Note that the variance-covariance of DH- $k$  and RIL- $k$  converge with increasing  $k$ .

Formulas for DH- $k$  and RIL- $k$  in the general case of four-way crosses have been validated by simulations for  $k \in \llbracket 1, 6 \rrbracket$  (Table 1 S2 and Table 2 S2). The observed high positive correlations (Table 1 S2) and low mean squared differences (Table 2 S2) between predicted (derivation) and empirical (*in silico*) values validate the presented formulas. Lower squared correlations between predicted and empirical values were observed for  $\mu_c^{(sel)}$  and  $\mu_{c(+)}^{(sel)}$  compared to the variances and covariances. This can be explained by sampling bias in *in silico* simulations (50,000 progenies) where the  $P_1$  parental genome contribution before selection slightly differed from the expected value of 0.25 for four way crosses (ranging from 0.249 to 0.251).

**Table 1 S2** Squared correlations ( $R^2$ ) between empirical values (*in silico*) and predictions (derivation) per generation and type of progeny.

| Generation | $\sigma_T^2$ | $\sigma_C^2$ | $\sigma_{C(+)}^2$ | $\sigma_{T-C}$ | $\sigma_{T-C(+)}$ | $UC_T$ | $\mu_C^{(sel)}$ | $\mu_{C(+)}^{(sel)}$ |
|------------|--------------|--------------|-------------------|----------------|-------------------|--------|-----------------|----------------------|
| DH1        | 0.999        | 0.960        | 0.995             | 0.999          | 0.999             | 1.000  | 0.900           | 0.946                |
| DH2        | 0.999        | 0.964        | 0.995             | 0.998          | 0.998             | 1.000  | 0.909           | 0.952                |
| DH3        | 0.999        | 0.966        | 0.995             | 0.999          | 0.999             | 1.000  | 0.914           | 0.955                |
| DH4        | 0.999        | 0.969        | 0.995             | 0.999          | 0.999             | 1.000  | 0.912           | 0.955                |
| DH5        | 0.999        | 0.961        | 0.994             | 0.998          | 0.998             | 1.000  | 0.914           | 0.955                |
| DH6        | 0.999        | 0.963        | 0.994             | 0.998          | 0.998             | 1.000  | 0.913           | 0.955                |
| RIL1       | 0.999        | 0.957        | 0.994             | 0.999          | 0.999             | 1.000  | 0.938           | 0.967                |
| RIL2       | 0.999        | 0.957        | 0.994             | 0.999          | 0.999             | 1.000  | 0.917           | 0.957                |
| RIL3       | 0.999        | 0.960        | 0.994             | 0.998          | 0.998             | 1.000  | 0.918           | 0.958                |
| RIL4       | 0.999        | 0.962        | 0.994             | 0.998          | 0.998             | 1.000  | 0.915           | 0.956                |
| RIL5       | 0.999        | 0.962        | 0.994             | 0.998          | 0.998             | 1.000  | 0.912           | 0.955                |
| RIL6       | 0.999        | 0.962        | 0.994             | 0.999          | 0.998             | 1.000  | 0.911           | 0.954                |

**Table 2 S2** Mean squared difference between empirical values (*in silico*) and predictions (derivation) per generation and type of progeny.

| Generation | $\sigma_T^2$ | $\sigma_C^2$ | $\sigma_{C(+)}^2$ | $\sigma_{T-C}$ | $\sigma_{T-C(+)}$ | $UC_T$   | $\mu_C^{(sel)}$ | $\mu_{C(+)}^{(sel)}$ |
|------------|--------------|--------------|-------------------|----------------|-------------------|----------|-----------------|----------------------|
| DH1        | 5.20E-06     | 3.28E-09     | 3.52E-10          | 5.99E-08       | 2.07E-08          | 8.44E-04 | 4.92E-05        | 1.42E-05             |
| DH2        | 5.09E-06     | 2.81E-09     | 3.16E-10          | 6.65E-08       | 2.24E-08          | 7.02E-04 | 3.83E-05        | 1.12E-05             |
| DH3        | 5.36E-06     | 2.56E-09     | 2.97E-10          | 4.74E-08       | 1.51E-08          | 6.49E-04 | 3.50E-05        | 1.03E-05             |
| DH4        | 4.56E-06     | 2.30E-09     | 2.87E-10          | 5.16E-08       | 1.66E-08          | 6.85E-04 | 3.55E-05        | 1.05E-05             |
| DH5        | 4.83E-06     | 2.88E-09     | 3.32E-10          | 5.95E-08       | 1.99E-08          | 6.40E-04 | 3.47E-05        | 1.03E-05             |
| DH6        | 4.76E-06     | 2.74E-09     | 3.14E-10          | 6.08E-08       | 1.96E-08          | 6.77E-04 | 3.47E-05        | 1.04E-05             |
| RIL1       | 2.25E-06     | 1.56E-09     | 1.81E-10          | 2.96E-08       | 9.80E-09          | 4.30E-04 | 2.51E-05        | 7.54E-06             |
| RIL2       | 3.26E-06     | 2.29E-09     | 2.69E-10          | 4.09E-08       | 1.37E-08          | 5.73E-04 | 3.40E-05        | 1.00E-05             |
| RIL3       | 3.93E-06     | 2.58E-09     | 3.05E-10          | 5.28E-08       | 1.72E-08          | 6.22E-04 | 3.34E-05        | 9.84E-06             |
| RIL4       | 4.49E-06     | 2.59E-09     | 3.02E-10          | 5.64E-08       | 1.81E-08          | 6.59E-04 | 3.43E-05        | 1.01E-05             |
| RIL5       | 4.91E-06     | 2.69E-09     | 3.10E-10          | 5.59E-08       | 1.83E-08          | 6.65E-04 | 3.53E-05        | 1.04E-05             |
| RIL6       | 4.91E-06     | 2.71E-09     | 3.13E-10          | 5.54E-08       | 1.83E-08          | 6.63E-04 | 3.59E-05        | 1.06E-05             |

23 Predicted RIL progeny variance for the simulated agronomic trait increased with the number of selfing  
 24 generations considered ( $k$ ) and converged toward DH progeny variance after five generations of selfing  
 25 ( $k = 5$ ) (Figure 1 S2). We observed that some crosses profited more from an increase in selfing  
 26 generations by generating more variance compared to others. An example with two crosses is shown  
 27 in Figure 2 S2. While the cross visualized in blue showed a higher variance in generation RIL-1 than the  
 28 cross visualized in orange, it reached a plateau faster and showed a lower variance than the orange  
 29 cross with  $k \geq 3$ . Differences in the speed to release variance between crosses is likely due to  
 30 differences in the recombination frequency between segregating QTLs in parental lines. This  
 31 underlines the interest of predicting RIL progeny variance using proposed algebraic formula.

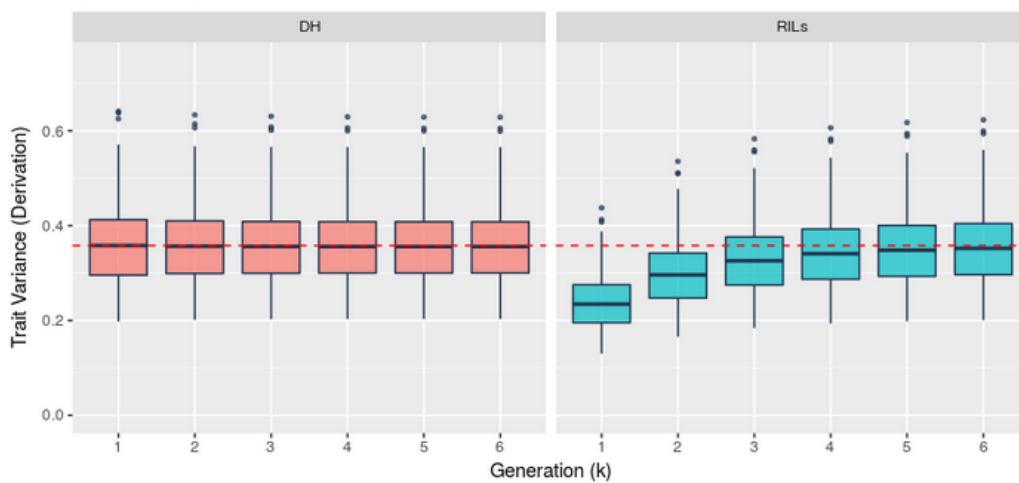

**Figure 1 S2** Evolution of predicted progeny trait variance depending on progeny type (DH, left or RIL, right) and generation ( $k$ ). The red dotted line presents the median DH progeny variance over 100 crosses.

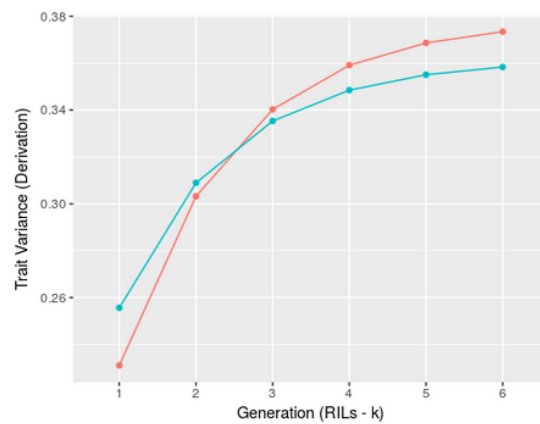

**Figure 2 S2** Example of two crosses showing different evolutions of predicted RIL progeny variance depending on the selfing generation ( $k$ ).

#### Literature cited

Broman K. W., 2012 Genotype probabilities at intermediate generations in the construction of recombinant inbred lines. *Genetics* 190: 403–412.

Lehermeier C., S. Teyssèdre, and C.-C. Schön, 2017 Genetic Gain Increases by Applying the Usefulness Criterion with Improved Variance Prediction in Selection of Crosses. *Genetics* 207: 1651–1661.
